# Supplementary material for: Efficacy and Safety of Secukinumab in Chronic Plaque Psoriasis and Psoriatic Arthritis Therapy
Source: Springer Nature journal article supplement (doi:10.1007/s13555-014-0042-5), 2014-01-22
Supplement: MOESM1 [file 9271010]

- Plaque psoriasis is a chronic inflammatory skin disease affecting 1 to 3% of the general population causing a significant impairment of quality of life, particularly when diffuse and recalcitrant to treatments.
- Moderate-to-severe psoriasis is commonly associated with comorbidities through a common genetic background and the sharing of inflammatory pathways.
- Pathogenesis of chronic plaque psoriasis depends on environmental and genetic factors, and involves abnormal innate and adaptive immune responses in the skin.
- Interleukin (IL)-17 is a key ‘driver’ cytokine in the pathogenesis of psoriasis and, thus, represents an important therapeutic target.
- Secukinumab is a fully human IgG1 $\kappa$  monoclonal antibody that selectively binds and neutralizes IL-17A. Its efficacy in chronic plaque psoriasis has been demonstrated in different phase II clinical trials. No new safety signals have emerged so far.

This summary slide represents the opinions of the authors. This work was supported by the Ministero della Salute, and the Ministero dell’Istruzione, Università e Ricerca Scientifica (Programmi di Ricerca Scientifica di Rilevante Interesse Nazionale [PRIN]), and by the Association for Dermatological Research (Italy). For a full list of acknowledgments and conflicts of interest for all authors of this article, please see the full text online. Copyright © The Authors 2014. Creative Commons Attribution Noncommercial License (CC BY-NC).
